# Supplementary material for: Qualifying a human Liver-Chip for predictive toxicology: Performance assessment and economic implications
Source: bioRxiv or medRxiv preprint supplement (doi:10.1101/2021.12.14.472674), 2022-08-02
Supplement: Supplementary file [file media-1.pdf]

## Qualifying a human Liver-Chip for predictive toxicology: Performance assessment and economic implications

Ewart et al.

### Supplementary Material

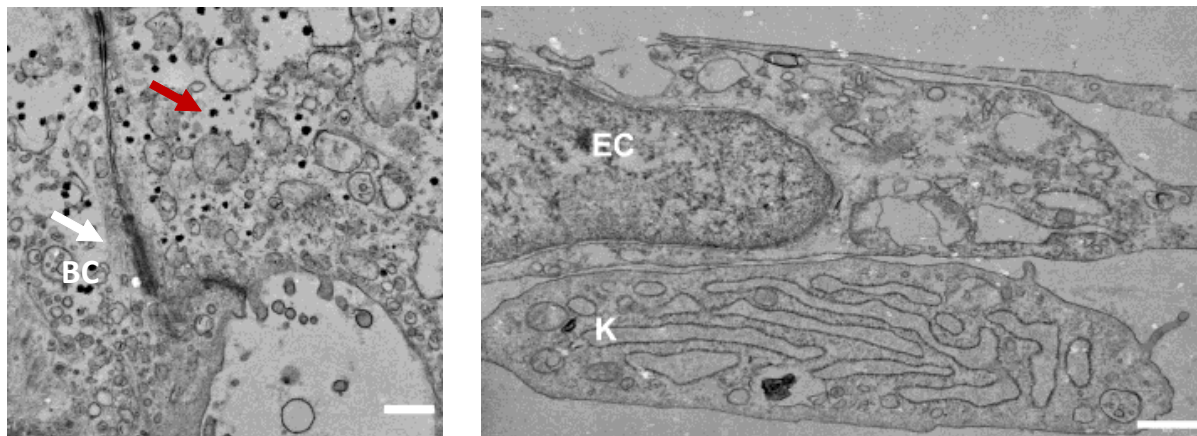

**Supplementary Figure S1.** Representative transmission electron microscopy images showing a well-formed bile canaliculus (bc) between neighboring hepatocytes (left) and cell-cell contact formation between a Kupffer (K) cell and liver sinusoidal endothelial cell (right) (bar, 0.5  $\mu\text{m}$ ).

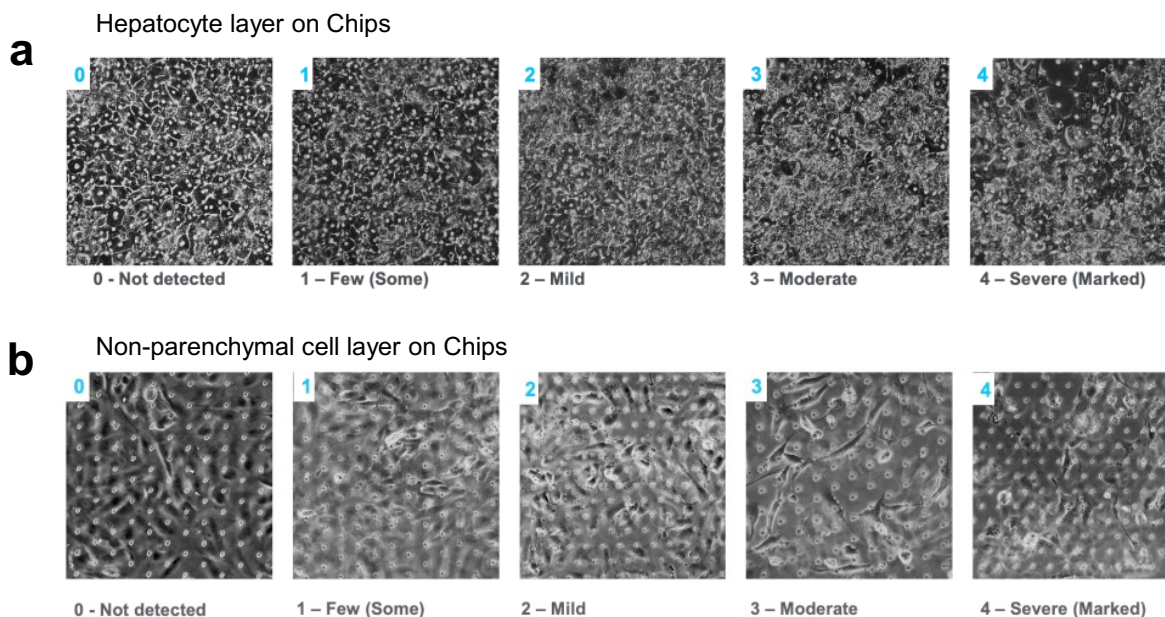

**Supplementary Figure S2.** a) Representative brightfield images to depict the cellular morphology score in the top channel of the Liver-Chip which contains hepatocytes. A score of 0 represents no hepatotoxicity detected, which is defined by 95-100% healthy hepatocyte morphology, hexagonal shape containing binucleated cells, clear cell cytoplasm, distinctive cell junctions and less than 5% dead cells. A score of 1 represents at least 85% healthy hepatocyte morphology, a hexagonal shape containing binucleated cells, clear cell cytoplasm, distinctive cell junctions but < 15% are dead cells. A score of 2 represents mild hepatotoxicity with > 70% monolayer of hepatocytes visible, evidence that cells have begun to lose their distinct cell junctions, many cells contain a granulated cytoplasm but < 30% are dead cells. A score of 3 represents moderate hepatotoxicity with severe granulation of cytoplasm and most of the cells have lost their junctions. Approximately 50% of the cells are considered dead. A score of 4 represents severe hepatotoxicity with agglomeration of cell debris and > 50% of the cells are considered dead. The pores on the membrane become visible as there is no longer a cellular monolayer. b) Representative brightfield images to depict the cellular morphology score in the bottom channel of the Liver-Chip which contains non-parenchymal cells. A score of 0 represents no cytotoxicity detected, with an intact monolayer and <1% of the cells are dead. A score of 1 represents at least 90% of the monolayer is present and there are <10% dead cells. A score of 2 represents mild cytotoxicity with > 80% of the monolayer present and < 20% are dead cells. A score of 3 represents moderate cytotoxicity with > 50% of the monolayer present and < 50% are dead cells. A score of 4 represents severe cytotoxicity with > 50% of the cells are considered dead.

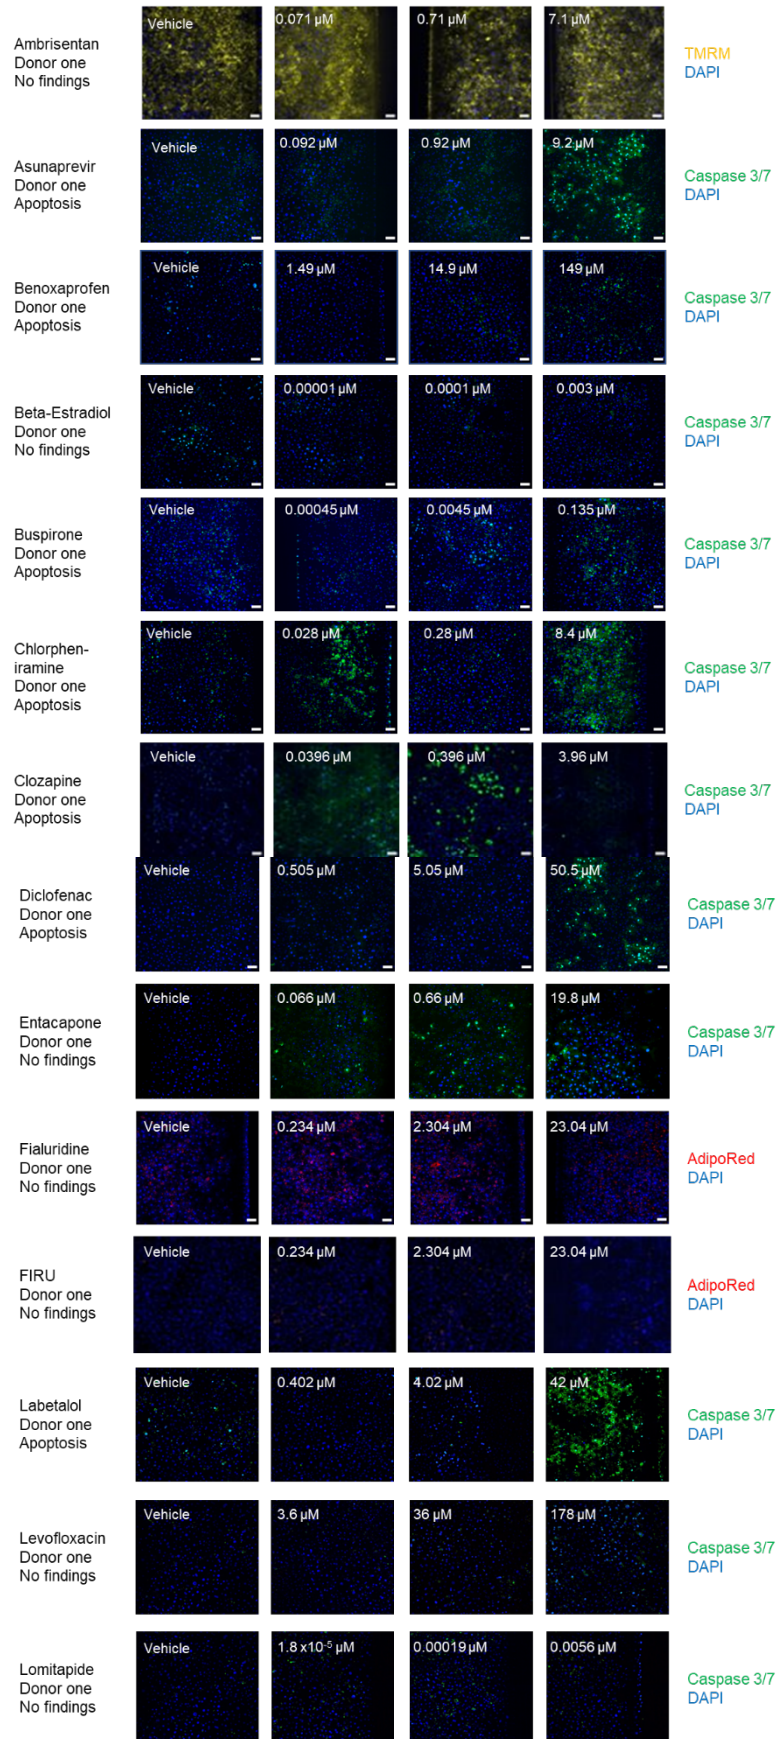



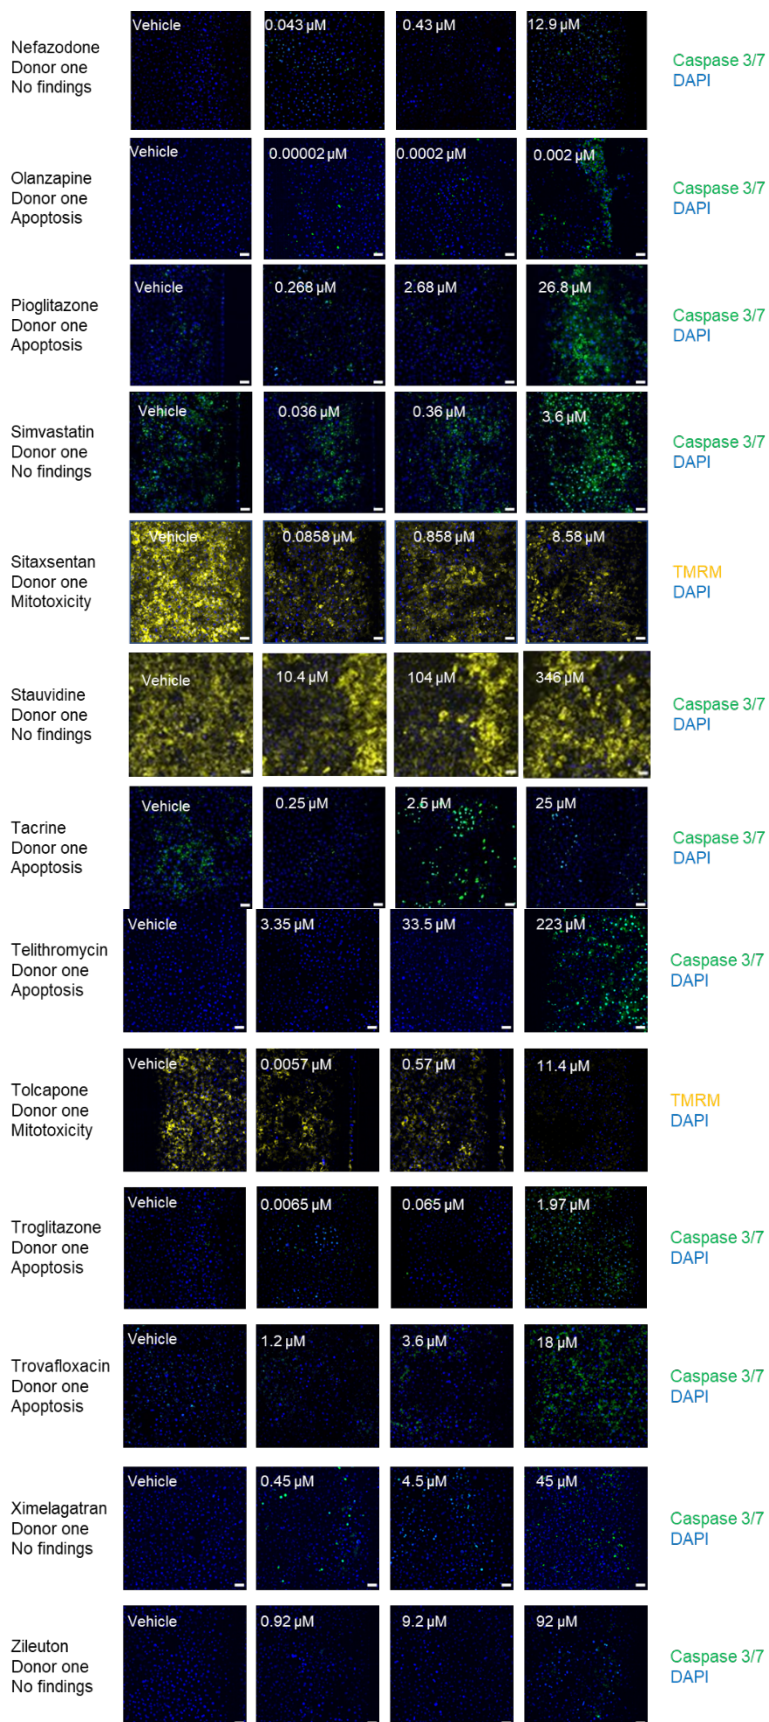



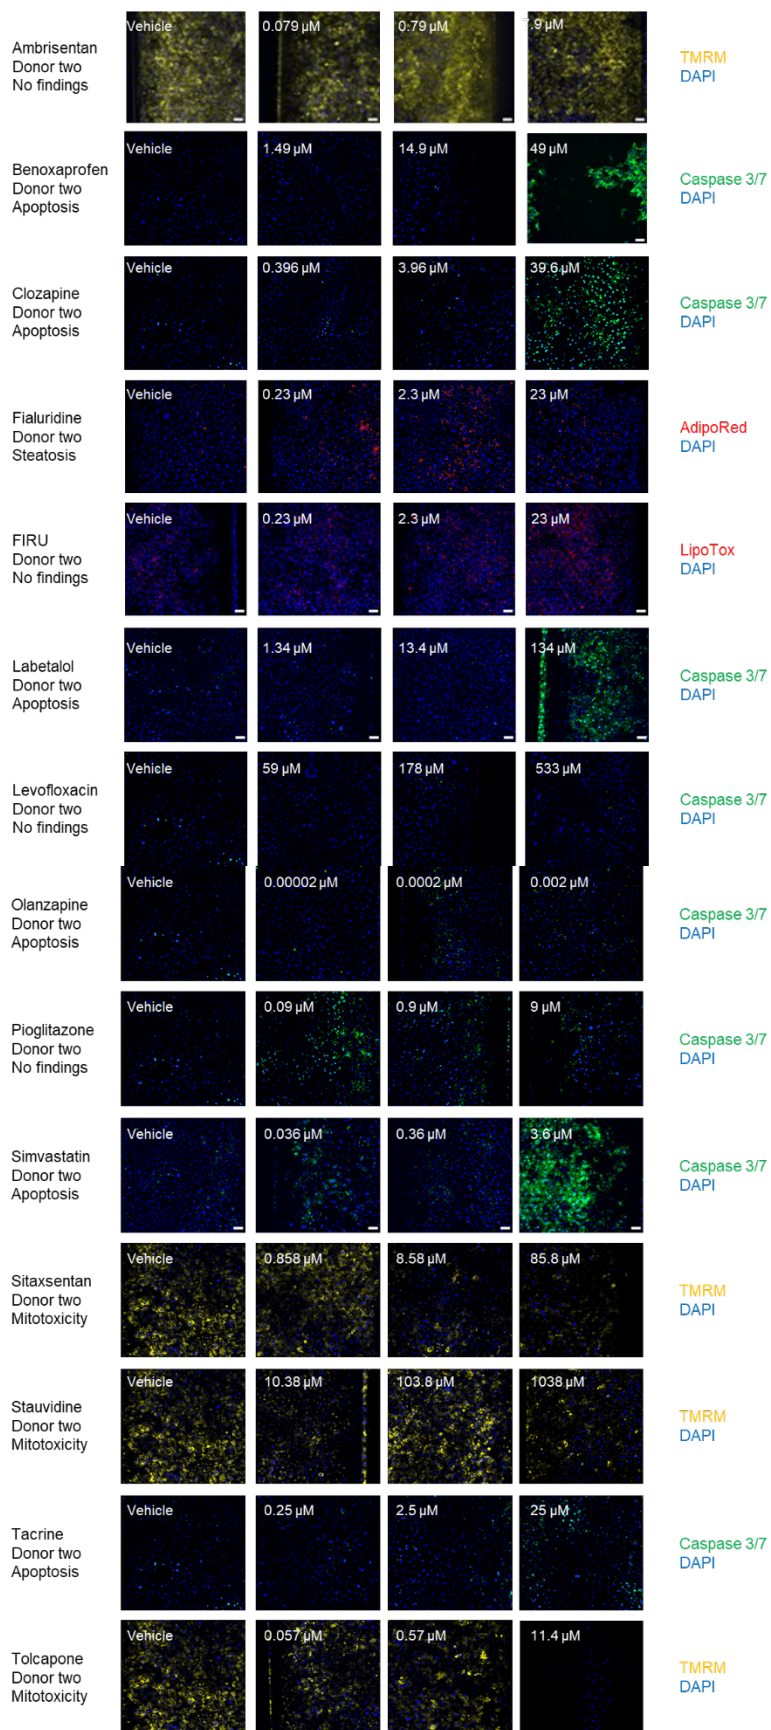

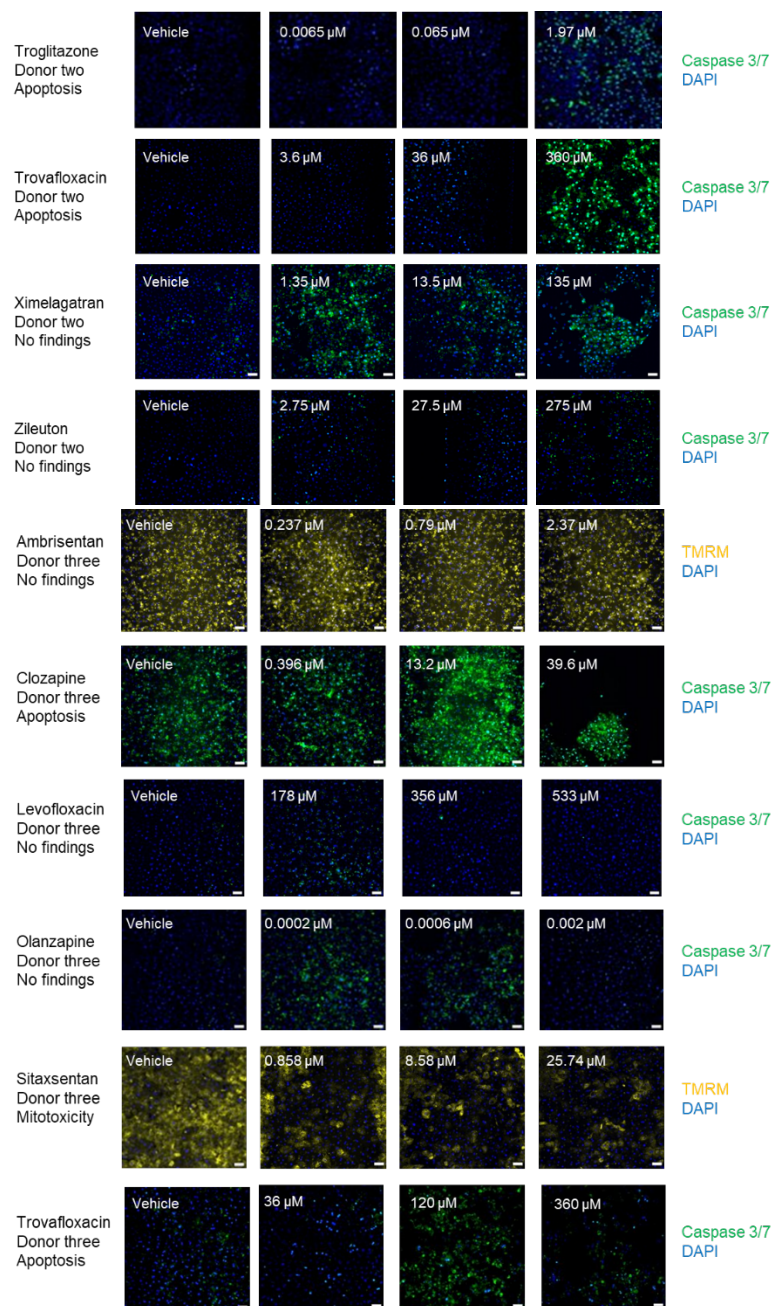

**Supplementary Figure S3.** Representative immunofluorescent images from day 7 post-vehicle or drug administration of the hepatocyte cell layer in the top channel of the chip. Each drug is shown with its free drug concentration and corresponding vehicle image that was used for thresholding across each donor the drug was tested in. The data support the immunofluorescent findings statement in Table 2 and 3.

| Criteria/<br>Cell Type | Hepatocyte<br>Donor one                  | Hepatocyte<br>Donor two                  | Hepatocyte<br>Donor three | Liver<br>Sinusoidal<br>Endothelial<br>Cells  | Kupffer Cell                                                     | Stellate Cell                                                           |
|------------------------|------------------------------------------|------------------------------------------|---------------------------|----------------------------------------------|------------------------------------------------------------------|-------------------------------------------------------------------------|
| Donor<br>gender        | Male                                     | Male                                     | Female                    | Male                                         | Female                                                           | Male                                                                    |
| Donor age              | 53 years                                 | 26 years                                 | 77 years                  | Unknown                                      | 25 years                                                         | 21-25 years                                                             |
| Race                   | Caucasian                                | Caucasian                                | African-<br>American      | Unknown                                      | Caucasian                                                        | Unknown                                                                 |
| BMI                    | 18.1                                     | 22.2                                     | 28.5                      | Unknown                                      | 19.7                                                             | 20-25                                                                   |
| Viability              | 90%                                      | 93%                                      | 96%                       | 93%                                          | 70%                                                              | 91%                                                                     |
| Vendor                 | Thermo                                   | Thermo                                   | Thermo                    | Cell Systems                                 | Lonza                                                            | iXCells                                                                 |
| Phenotypic<br>Markers  | MRP2<br>positive<br>Vimentin<br>negative | MRP2<br>positive<br>Vimentin<br>negative | MRP2<br>positive          | Stabilin<br>positive<br>Vimentin<br>positive | CD68<br>positive,<br>CD11b<br>positive,<br>Alpha-SMA<br>negative | Vimentin<br>positive,<br>AdipoRed<br>positive,<br>Alpha-SMA<br>positive |

**Supplementary Table S1.** Details of the cell sources and their defining characteristics used in the investigation.



| Drug                     | Human Cmax Total             | Expected Fraction Unbound in Plasma | Multiplier xCmax | Chip Dosing Concentration (uM) Total | Chip Dosing Concentration (uM) Free | Cycle 1 | Cycle 2 | Cycle 3 | Cycle 4 | Cycle 5 |
|--------------------------|------------------------------|-------------------------------------|------------------|--------------------------------------|-------------------------------------|---------|---------|---------|---------|---------|
| Ambrisentan              | 0.79 $\mu$ M <sup>26</sup>   | 0.01 <sup>60</sup>                  | 0.1              | 0.0024                               | 0.00079                             |         |         |         |         |         |
|                          |                              |                                     | 0.3              | 0.0071                               | 0.00237                             |         |         |         |         |         |
|                          |                              |                                     | 1                | 0.0235                               | 0.0079                              |         |         |         |         |         |
|                          |                              |                                     | 3                | 0.0705                               | 0.0237                              |         |         |         |         |         |
|                          |                              |                                     | 10               | 0.2351                               | 0.079                               |         |         |         |         |         |
|                          |                              |                                     | 30               | 0.7054                               | 0.237                               |         |         |         |         |         |
|                          |                              |                                     | 100              | 2.351                                | 0.79                                |         |         |         |         |         |
|                          |                              |                                     | 300              | 7.054                                | 2.37                                |         |         |         |         |         |
| Asunaprevir              | 0.7644 $\mu$ M <sup>51</sup> | 0.012 <sup>61</sup>                 | 1000             | 23.51                                | 7.9                                 |         |         |         |         |         |
|                          |                              |                                     | 3                | 0.073                                | 0.0275184                           |         |         |         |         |         |
|                          |                              |                                     | 10               | 0.243                                | 0.091728                            |         |         |         |         |         |
|                          |                              |                                     | 30               | 0.728                                | 0.275184                            |         |         |         |         |         |
|                          |                              |                                     | 100              | 2.428                                | 0.91728                             |         |         |         |         |         |
| Benoxaprofen***          | 149.1 $\mu$ M <sup>52</sup>  | 0.01 <sup>62</sup>                  | 300              | 7.284                                | 2.75184                             |         |         |         |         |         |
|                          |                              |                                     | 1000             | 24.280                               | 9.1728                              |         |         |         |         |         |
|                          |                              |                                     | 0.1              | 0.444                                | 0.1491                              |         |         |         |         |         |
|                          |                              |                                     | 0.3              | 1.331                                | 0.4473                              |         |         |         |         |         |
|                          |                              |                                     | 1                | 4.438                                | 1.491                               |         |         |         |         |         |
| Beta-Estradiol           | 0.0006 $\mu$ M <sup>53</sup> | 0.016 <sup>61</sup>                 | 3                | 13.31                                | 4.473                               |         |         |         |         |         |
|                          |                              |                                     | 10               | 44.38                                | 14.91                               |         |         |         |         |         |
|                          |                              |                                     | 30               | 133.13                               | 44.73                               |         |         |         |         |         |
|                          |                              |                                     | 100              | 443.75                               | 149.1                               |         |         |         |         |         |
|                          |                              |                                     | 0.1              | 0                                    | 0.0000096                           |         |         |         |         |         |
|                          |                              |                                     | 0.3              | 0                                    | 0.0000288                           |         |         |         |         |         |
|                          |                              |                                     | 1                | 0                                    | 0.000096                            |         |         |         |         |         |
| Buspirone                | 0.009 $\mu$ M <sup>54</sup>  | 0.05 <sup>62</sup>                  | 3                | 0.0001                               | 0.000288                            |         |         |         |         |         |
|                          |                              |                                     | 10               | 0.0002                               | 0.00096                             |         |         |         |         |         |
|                          |                              |                                     | 30               | 0.0007                               | 0.00288                             |         |         |         |         |         |
|                          |                              |                                     | 100              | 0.0022                               | 0.0096                              |         |         |         |         |         |
|                          |                              |                                     | 300              | 0.0066                               | 0.0288                              |         |         |         |         |         |
|                          |                              |                                     | 0.1              | 6.25869E-05                          | 0.000045                            |         |         |         |         |         |
|                          |                              |                                     | 0.3              | 0.00019                              | 0.000135                            |         |         |         |         |         |
| Chlorpheniramine maleate | 0.04 $\mu$ M <sup>54</sup>   | 0.7 <sup>61</sup>                   | 1                | 0.00063                              | 0.00045                             |         |         |         |         |         |
|                          |                              |                                     | 3                | 0.00188                              | 0.00135                             |         |         |         |         |         |
|                          |                              |                                     | 10               | 0.00626                              | 0.0045                              |         |         |         |         |         |
|                          |                              |                                     | 30               | 0.01878                              | 0.0135                              |         |         |         |         |         |
|                          |                              |                                     | 100              | 0.06259                              | 0.045                               |         |         |         |         |         |
|                          |                              |                                     | 300              | 0.18776                              | 0.135                               |         |         |         |         |         |
|                          |                              |                                     | 0.1              | 0.0028                               | 0.0028                              |         |         |         |         |         |
| Clozapine                | 2.4 $\mu$ M <sup>54</sup>    | 0.055 <sup>61</sup>                 | 0.3              | 0.0085                               | 0.0084                              |         |         |         |         |         |
|                          |                              |                                     | 1                | 0.0283                               | 0.028                               |         |         |         |         |         |
|                          |                              |                                     | 3                | 0.0849                               | 0.084                               |         |         |         |         |         |
|                          |                              |                                     | 10               | 0.2831                               | 0.28                                |         |         |         |         |         |
|                          |                              |                                     | 30               | 0.8493                               | 0.84                                |         |         |         |         |         |
|                          |                              |                                     | 100              | 2.8311                               | 2.8                                 |         |         |         |         |         |
|                          |                              |                                     | 300              | 8.4934                               | 8.4                                 |         |         |         |         |         |
| Diclofenac sodium        | 10.1 $\mu$ M <sup>54</sup>   | 0.005 <sup>61</sup>                 | 0.1              | 0.0178                               | 0.0132                              |         |         |         |         |         |
|                          |                              |                                     | 0.3              | 0.0535                               | 0.0396                              |         |         |         |         |         |
|                          |                              |                                     | 1                | 0.1784                               | 0.132                               |         |         |         |         |         |
|                          |                              |                                     | 3                | 0.5351                               | 0.396                               |         |         |         |         |         |
|                          |                              |                                     | 10               | 1.7838                               | 1.32                                |         |         |         |         |         |
|                          |                              |                                     | 30               | 5.3514                               | 3.96                                |         |         |         |         |         |
|                          |                              |                                     | 100              | 17.838                               | 13.2                                |         |         |         |         |         |
| Diclofenac sodium        | 10.1 $\mu$ M <sup>54</sup>   | 0.005 <sup>61</sup>                 | 300              | 53.514                               | 39.6                                |         |         |         |         |         |
|                          |                              |                                     | 3                | 0.7545                               | 0.505                               |         |         |         |         |         |
|                          |                              |                                     | 10               | 2.5149                               | 1.515                               |         |         |         |         |         |
|                          |                              |                                     | 30               | 7.5448                               | 5.05                                |         |         |         |         |         |
|                          |                              |                                     | 100              | 25.149                               | 15.15                               |         |         |         |         |         |
| 300                      | 75.448                       | 45.45                               |                  |                                      |                                     |         |         |         |         |         |
| 1000                     | 251.49                       | 151.5                               |                  |                                      |                                     |         |         |         |         |         |

| Drug                                                   | Human Cmax Total        | Expected Fraction Unbound in Plasma | Multiplier xCmax | Chip Dosing Concentration (uM) Total | Chip Dosing Concentration (uM) Free | Cycle 1 | Cycle 2 | Cycle 3 | Cycle 4 | Cycle 5 |
|--------------------------------------------------------|-------------------------|-------------------------------------|------------------|--------------------------------------|-------------------------------------|---------|---------|---------|---------|---------|
| Entacapone                                             | 3.3µM <sup>55</sup>     | 0.02 <sup>61</sup>                  | 0.1              | 0.0131                               | 0.0066                              |         |         |         |         |         |
|                                                        |                         |                                     | 0.3              | 0.0392                               | 0.0198                              |         |         |         |         |         |
|                                                        |                         |                                     | 1                | 0.1307                               | 0.066                               |         |         |         |         |         |
|                                                        |                         |                                     | 3                | 0.3921                               | 0.198                               |         |         |         |         |         |
|                                                        |                         |                                     | 10               | 1.3069                               | 0.66                                |         |         |         |         |         |
|                                                        |                         |                                     | 30               | 3.9208                               | 1.98                                |         |         |         |         |         |
|                                                        |                         |                                     | 100              | 13.069                               | 6.6                                 |         |         |         |         |         |
| Fialuridine                                            | 0.64µM <sup>27</sup>    | 0.36 <sup>62</sup>                  | 0.1              | 0.0239                               | 0.02304                             |         |         |         |         |         |
|                                                        |                         |                                     | 0.3              | 0.0716                               | 0.06912                             |         |         |         |         |         |
|                                                        |                         |                                     | 1                | 0.2385                               | 0.2304                              |         |         |         |         |         |
|                                                        |                         |                                     | 3                | 0.7155                               | 0.6912                              |         |         |         |         |         |
|                                                        |                         |                                     | 10               | 2.3851                               | 2.304                               |         |         |         |         |         |
|                                                        |                         |                                     | 30               | 7.1553                               | 6.912                               |         |         |         |         |         |
|                                                        |                         |                                     | 100              | 23.851                               | 23.04                               |         |         |         |         |         |
| FIRU (5-iodo-1-92-fluoro-2-deoxyribofuranosyl)uracil)* | *0.64µM <sup>27</sup>   | *0.36 <sup>62</sup>                 | 0.1              | 0.0239                               | 0.02304                             |         |         |         |         |         |
|                                                        |                         |                                     | 0.3              | 0.0716                               | 0.06912                             |         |         |         |         |         |
|                                                        |                         |                                     | 1                | 0.2385                               | 0.2304                              |         |         |         |         |         |
|                                                        |                         |                                     | 3                | 0.7155                               | 0.6912                              |         |         |         |         |         |
|                                                        |                         |                                     | 10               | 2.3851                               | 2.304                               |         |         |         |         |         |
|                                                        |                         |                                     | 30               | 7.1553                               | 6.912                               |         |         |         |         |         |
|                                                        |                         |                                     | 100              | 23.851                               | 23.04                               |         |         |         |         |         |
| Labetalol***                                           | 2.68µM <sup>27</sup>    | 0.5 <sup>61</sup>                   | 0.1              | 0.1367                               | 0.134                               |         |         |         |         |         |
|                                                        |                         |                                     | 0.3              | 0.4102                               | 0.402                               |         |         |         |         |         |
|                                                        |                         |                                     | 1                | 1.3673                               | 1.34                                |         |         |         |         |         |
|                                                        |                         |                                     | 3                | 4.1020                               | 4.02                                |         |         |         |         |         |
|                                                        |                         |                                     | 10               | 13.673                               | 13.4                                |         |         |         |         |         |
|                                                        |                         |                                     | 30               | 41.020                               | 40.2                                |         |         |         |         |         |
|                                                        |                         |                                     | 100              | 136.73                               | 134                                 |         |         |         |         |         |
| Levofloxacin***                                        | 15.8µM <sup>33</sup>    | 0.75 <sup>61</sup>                  | 0.1              | 1.1934                               | 1.185                               |         |         |         |         |         |
|                                                        |                         |                                     | 0.3              | 3.5801                               | 3.555                               |         |         |         |         |         |
|                                                        |                         |                                     | 1                | 11.934                               | 11.85                               |         |         |         |         |         |
|                                                        |                         |                                     | 3                | 35.801                               | 35.55                               |         |         |         |         |         |
|                                                        |                         |                                     | 5                | 59.668                               | 59.25                               |         |         |         |         |         |
|                                                        |                         |                                     | 10               | 119.34                               | 118.5                               |         |         |         |         |         |
|                                                        |                         |                                     | 15               | 179.00                               | 177.75                              |         |         |         |         |         |
| Lomitapide                                             | 0.0017µM <sup>66</sup>  | 0.002 <sup>61</sup>                 | 0.9              | 3.41906E-05                          | 3.11374E-06                         |         |         |         |         |         |
|                                                        |                         |                                     | 2.6              | 9.87728E-05                          | 8.99524E-06                         |         |         |         |         |         |
|                                                        |                         |                                     | 5.3              | 0.0002                               | 1.83365E-05                         |         |         |         |         |         |
|                                                        |                         |                                     | 15.8             | 0.0006                               | 5.46634E-05                         |         |         |         |         |         |
|                                                        |                         |                                     | 55.3             | 0.0021                               | 0.000191322                         |         |         |         |         |         |
|                                                        |                         |                                     | 163.2            | 0.0062                               | 0.000564624                         |         |         |         |         |         |
|                                                        |                         |                                     | 544.9            | 0.0207                               | 0.001885195                         |         |         |         |         |         |
| 1634.7                                                 | 0.0621                  | 0.005655585                         |                  |                                      |                                     |         |         |         |         |         |
| Nefazodone hydrochloride                               | 4.3µM <sup>54</sup>     | 0.01 <sup>62</sup>                  | 0.1              | 0.0128                               | 0.0043                              |         |         |         |         |         |
|                                                        |                         |                                     | 0.3              | 0.0384                               | 0.0129                              |         |         |         |         |         |
|                                                        |                         |                                     | 1                | 0.1280                               | 0.043                               |         |         |         |         |         |
|                                                        |                         |                                     | 3                | 0.3839                               | 0.129                               |         |         |         |         |         |
|                                                        |                         |                                     | 10               | 1.2798                               | 0.43                                |         |         |         |         |         |
|                                                        |                         |                                     | 30               | 3.8393                               | 1.29                                |         |         |         |         |         |
|                                                        |                         |                                     | 100              | 12.798                               | 4.3                                 |         |         |         |         |         |
| Olanzapine                                             | 0.00009µM <sup>57</sup> | 0.07 <sup>63</sup>                  | 0.1              | 7.97468E-07                          | 0.0000063                           |         |         |         |         |         |
|                                                        |                         |                                     | 0.3              | 2.39241E-06                          | 0.0000189                           |         |         |         |         |         |
|                                                        |                         |                                     | 1                | 7.97468E-06                          | 0.000063                            |         |         |         |         |         |
|                                                        |                         |                                     | 3                | 2.39241E-05                          | 0.000189                            |         |         |         |         |         |
|                                                        |                         |                                     | 10               | 7.97468E-05                          | 0.00063                             |         |         |         |         |         |
|                                                        |                         |                                     | 30               | 0.00024                              | 0.00189                             |         |         |         |         |         |
|                                                        |                         |                                     | 100              | 0.00080                              | 0.0063                              |         |         |         |         |         |
| 300                                                    | 0.00239                 | 0.0189                              |                  |                                      |                                     |         |         |         |         |         |

| Drug                      | Human Cmax Total     | Expected Fraction Unbound in Plasma | Multiplier xCmax | Chip Dosing Concentration (uM) Total | Chip Dosing Concentration (uM) Free | Cycle 1 | Cycle 2 | Cycle 3 | Cycle 4 | Cycle 5 |
|---------------------------|----------------------|-------------------------------------|------------------|--------------------------------------|-------------------------------------|---------|---------|---------|---------|---------|
| Pioglitazone              | 3µM <sup>33</sup>    | 0.01 <sup>62</sup>                  | 0.1              | 0.0089                               | 0.003                               |         |         |         |         |         |
|                           |                      |                                     | 0.3              | 0.0268                               | 0.009                               |         |         |         |         |         |
|                           |                      |                                     | 1                | 0.0893                               | 0.03                                |         |         |         |         |         |
|                           |                      |                                     | 3                | 0.2679                               | 0.09                                |         |         |         |         |         |
|                           |                      |                                     | 10               | 0.8929                               | 0.3                                 |         |         |         |         |         |
|                           |                      |                                     | 30               | 2.6786                               | 0.9                                 |         |         |         |         |         |
|                           |                      |                                     | 100              | 8.9286                               | 3                                   |         |         |         |         |         |
|                           |                      |                                     | 300              | 26.786                               | 9                                   |         |         |         |         |         |
| Simvastatin               | 0.02µM <sup>26</sup> | 0.06 <sup>63</sup>                  | 0.1              | 0.0002                               | 0.00012                             |         |         |         |         |         |
|                           |                      |                                     | 0.3              | 0.0005                               | 0.00036                             |         |         |         |         |         |
|                           |                      |                                     | 1                | 0.0016                               | 0.0012                              |         |         |         |         |         |
|                           |                      |                                     | 3                | 0.0047                               | 0.0036                              |         |         |         |         |         |
|                           |                      |                                     | 10               | 0.0158                               | 0.012                               |         |         |         |         |         |
|                           |                      |                                     | 30               | 0.0473                               | 0.036                               |         |         |         |         |         |
|                           |                      |                                     | 100              | 0.1577                               | 0.12                                |         |         |         |         |         |
|                           |                      |                                     | 300              | 0.4731                               | 0.36                                |         |         |         |         |         |
|                           |                      |                                     | 1000             | 1.5769                               | 1.2                                 |         |         |         |         |         |
| 3000                      | 4.7306               | 3.6                                 |                  |                                      |                                     |         |         |         |         |         |
| Sitax(s)entan sodium salt | 28.6µM <sup>58</sup> | 0.01 <sup>64</sup>                  | 0.1              | 0.0851                               | 0.0286                              |         |         |         |         |         |
|                           |                      |                                     | 0.3              | 0.2554                               | 0.0858                              |         |         |         |         |         |
|                           |                      |                                     | 1                | 0.8512                               | 0.286                               |         |         |         |         |         |
|                           |                      |                                     | 3                | 2.5536                               | 0.858                               |         |         |         |         |         |
|                           |                      |                                     | 10               | 8.5119                               | 2.86                                |         |         |         |         |         |
|                           |                      |                                     | 30               | 25.536                               | 8.58                                |         |         |         |         |         |
|                           |                      |                                     | 90               | 76.607                               | 25.74                               |         |         |         |         |         |
|                           |                      |                                     | 100              | 85.119                               | 28.6                                |         |         |         |         |         |
| 300                       | 255.36               | 85.8                                |                  |                                      |                                     |         |         |         |         |         |
| Stavudine                 | 3.46µM <sup>33</sup> | 1 <sup>61</sup>                     | 0.1              | 0.346                                | 0.346                               |         |         |         |         |         |
|                           |                      |                                     | 0.3              | 1.038                                | 1.038                               |         |         |         |         |         |
|                           |                      |                                     | 1                | 3.460                                | 3.46                                |         |         |         |         |         |
|                           |                      |                                     | 3                | 10.38                                | 10.38                               |         |         |         |         |         |
|                           |                      |                                     | 10               | 34.60                                | 34.6                                |         |         |         |         |         |
|                           |                      |                                     | 30               | 103.8                                | 103.8                               |         |         |         |         |         |
|                           |                      |                                     | 60               | 207.6                                | 207.6                               |         |         |         |         |         |
|                           |                      |                                     | 100              | 346                                  | 346                                 |         |         |         |         |         |
| 300                       | 1038                 | 1038                                |                  |                                      |                                     |         |         |         |         |         |
| Tacrine                   | 0.1µM <sup>33</sup>  | 0.25 <sup>61</sup>                  | 0.1              | 0.0027                               | 0.0025                              |         |         |         |         |         |
|                           |                      |                                     | 0.3              | 0.0080                               | 0.0075                              |         |         |         |         |         |
|                           |                      |                                     | 1                | 0.0265                               | 0.025                               |         |         |         |         |         |
|                           |                      |                                     | 3                | 0.0795                               | 0.075                               |         |         |         |         |         |
|                           |                      |                                     | 10               | 0.2651                               | 0.25                                |         |         |         |         |         |
|                           |                      |                                     | 30               | 0.7953                               | 0.75                                |         |         |         |         |         |
|                           |                      |                                     | 100              | 2.6511                               | 2.5                                 |         |         |         |         |         |
|                           |                      |                                     | 300              | 7.9533                               | 7.5                                 |         |         |         |         |         |
| 1000                      | 26.511               | 25                                  |                  |                                      |                                     |         |         |         |         |         |
| Telithromycin             | 2.79µM <sup>59</sup> | 0.4 <sup>61</sup>                   | 0.00004          | 0.0001                               | 0.00012                             |         |         |         |         |         |
|                           |                      |                                     | 0.00013          | 0.0004                               | 0.00036                             |         |         |         |         |         |
|                           |                      |                                     | 0.00044          | 0.0012                               | 0.0012                              |         |         |         |         |         |
|                           |                      |                                     | 0.00133          | 0.0037                               | 0.0036                              |         |         |         |         |         |
|                           |                      |                                     | 0.00443          | 0.0124                               | 0.012                               |         |         |         |         |         |
|                           |                      |                                     | 0.01329          | 0.0371                               | 0.036                               |         |         |         |         |         |
|                           |                      |                                     | 0.04429          | 0.1236                               | 0.12                                |         |         |         |         |         |
|                           |                      |                                     | 0.13289          | 0.3708                               | 0.36                                |         |         |         |         |         |
|                           |                      |                                     | 1                | 1.1307                               | 1.116                               |         |         |         |         |         |
|                           |                      |                                     | 3                | 3.3921                               | 3.348                               |         |         |         |         |         |
|                           |                      |                                     | 10               | 11.307                               | 11.16                               |         |         |         |         |         |
|                           |                      |                                     | 30               | 33.921                               | 33.48                               |         |         |         |         |         |
|                           |                      |                                     | 100              | 113.07                               | 111.6                               |         |         |         |         |         |
| 200                       | 226.14               | 223.2                               |                  |                                      |                                     |         |         |         |         |         |



| Drug                   | Human C <sub>max</sub> Total | Expected Fraction Unbound in Plasma | Multiplier xC <sub>max</sub> | Chip Dosing Concentration (uM) Total | Chip Dosing Concentration (uM) Free | Cycle 1 | Cycle 2 | Cycle 3 | Cycle 4 | Cycle 5 |
|------------------------|------------------------------|-------------------------------------|------------------------------|--------------------------------------|-------------------------------------|---------|---------|---------|---------|---------|
| Tolcapone***           | 47.6µM <sup>64</sup>         | 0.0012 <sup>61</sup>                | 0.1                          | 0.10074                              | 0.005712                            |         |         |         |         |         |
|                        |                              |                                     | 0.3                          | 0.30222                              | 0.017136                            |         |         |         |         |         |
|                        |                              |                                     | 1                            | 1.00741                              | 0.05712                             |         |         |         |         |         |
|                        |                              |                                     | 3                            | 3.02222                              | 0.17136                             |         |         |         |         |         |
|                        |                              |                                     | 10                           | 10.0741                              | 0.5712                              |         |         |         |         |         |
|                        |                              |                                     | 30                           | 30.2222                              | 1.7136                              |         |         |         |         |         |
|                        |                              |                                     | 100                          | 100.741                              | 5.712                               |         |         |         |         |         |
|                        |                              |                                     | 200                          | 201.481                              | 11.424                              |         |         |         |         |         |
| Troglitazone           | 6.08µM <sup>63</sup>         | 0.0011 <sup>65</sup>                | 0.1                          | 0.01259                              | 0.000657036                         |         |         |         |         |         |
|                        |                              |                                     | 0.29                         | 0.03778                              | 0.001971107                         |         |         |         |         |         |
|                        |                              |                                     | 0.98                         | 0.12592                              | 0.006570357                         |         |         |         |         |         |
|                        |                              |                                     | 2.95                         | 0.37775                              | 0.019711072                         |         |         |         |         |         |
|                        |                              |                                     | 9.82                         | 1.25917                              | 0.065703574                         |         |         |         |         |         |
|                        |                              |                                     | 29.47                        | 3.77751                              | 0.197110722                         |         |         |         |         |         |
|                        |                              |                                     | 98.2                         | 12.5917                              | 0.65703574                          |         |         |         |         |         |
|                        |                              |                                     | 294.72                       | 37.7751                              | 1.971107219                         |         |         |         |         |         |
| Trovafloracin mesylate | 5µM <sup>63</sup>            | 0.24 <sup>61</sup>                  | 0.1                          | 0.12793                              | 0.12                                |         |         |         |         |         |
|                        |                              |                                     | 0.3                          | 0.38380                              | 0.36                                |         |         |         |         |         |
|                        |                              |                                     | 1                            | 1.27932                              | 1.2                                 |         |         |         |         |         |
|                        |                              |                                     | 3                            | 3.83795                              | 3.6                                 |         |         |         |         |         |
|                        |                              |                                     | 10                           | 12.7932                              | 12                                  |         |         |         |         |         |
|                        |                              |                                     | 15                           | 19.1898                              | 18                                  |         |         |         |         |         |
|                        |                              |                                     | 30                           | 38.3795                              | 36                                  |         |         |         |         |         |
|                        |                              |                                     | 100                          | 127.932                              | 120                                 |         |         |         |         |         |
| 300                    | 383.795                      | 360                                 |                              |                                      |                                     |         |         |         |         |         |
| Ximelagatran           | 0.45µM <sup>63</sup>         | 1                                   | 0.1                          | 0.045                                | 0.045                               |         |         |         |         |         |
|                        |                              |                                     | 0.3                          | 0.135                                | 0.135                               |         |         |         |         |         |
|                        |                              |                                     | 1                            | 0.45                                 | 0.45                                |         |         |         |         |         |
|                        |                              |                                     | 3                            | 1.35                                 | 1.35                                |         |         |         |         |         |
|                        |                              |                                     | 10                           | 4.5                                  | 4.5                                 |         |         |         |         |         |
|                        |                              |                                     | 30                           | 13.5                                 | 13.5                                |         |         |         |         |         |
|                        |                              |                                     | 100                          | 45                                   | 45                                  |         |         |         |         |         |
|                        |                              |                                     | 300                          | 135                                  | 135                                 |         |         |         |         |         |
| Zileuton               | 13.1µM <sup>63</sup>         | 0.07 <sup>62</sup>                  | 0.1                          | 0.1161                               | 0.0917                              |         |         |         |         |         |
|                        |                              |                                     | 0.3                          | 0.3482                               | 0.2751                              |         |         |         |         |         |
|                        |                              |                                     | 1                            | 1.1608                               | 0.917                               |         |         |         |         |         |
|                        |                              |                                     | 3                            | 3.4823                               | 2.751                               |         |         |         |         |         |
|                        |                              |                                     | 10                           | 11.608                               | 9.17                                |         |         |         |         |         |
|                        |                              |                                     | 30                           | 34.823                               | 27.51                               |         |         |         |         |         |
|                        |                              |                                     | 100                          | 116.08                               | 91.7                                |         |         |         |         |         |
|                        |                              |                                     | 300                          | 348.23                               | 275.1                               |         |         |         |         |         |

\*FIRU values assumed same as Fialuridine

\*\*A calculation error for Troglitazone led to slightly misaligned dosing concentrations such that the Multiplier xC<sub>max</sub> values aren't exact multiples of C<sub>max</sub>

\*\*\*Highest concentration limited by solubility

**Supplementary Table S2.** Drug information and dosing concentrations used in the investigation. Cycle-specific concentrations have been added for further clarity.

| Incremental DILI sensitivity | Tox FNR vs. Baseline | Clinical dev. success rate | Portfolio IRR | Portfolio eNPV (\$m) | NPV of chip costs (\$m) | IRR on chip investment | Portfolio NPV / NPV of base R&D costs | Steady state uplift in pre-tax profit (%) | Annualized industry-wide pre-tax profit uplift (\$m) |
|------------------------------|----------------------|----------------------------|---------------|----------------------|-------------------------|------------------------|---------------------------------------|-------------------------------------------|------------------------------------------------------|
| 0.0%                         | 100.0%               | 11.5%                      | 11.0%         | -3.5                 | -3.5                    | -3.5%                  | -0.2%                                 | -0.1%                                     | (207)                                                |
| 7.5%                         | 99.0%                | 11.5%                      | 11.0%         | 1.1                  | -3.6                    | 14.4%                  | 0.1%                                  | 0.0%                                      | 61                                                   |
| 14.9%                        | 98.0%                | 11.6%                      | 11.0%         | 5.7                  | -3.6                    | 24.7%                  | 0.3%                                  | 0.2%                                      | 331                                                  |
| 22.4%                        | 97.0%                | 11.6%                      | 11.1%         | 10.3                 | -3.6                    | 30.4%                  | 0.5%                                  | 0.3%                                      | 602                                                  |
| 29.8%                        | 96.0%                | 11.7%                      | 11.1%         | 15.0                 | -3.6                    | 33.8%                  | 0.8%                                  | 0.5%                                      | 876                                                  |
| 37.3%                        | 95.0%                | 11.7%                      | 11.2%         | 19.8                 | -3.6                    | 36.0%                  | 1.0%                                  | 0.7%                                      | 1,151                                                |
| 44.7%                        | 94.0%                | 11.7%                      | 11.2%         | 24.5                 | -3.6                    | 37.6%                  | 1.3%                                  | 0.8%                                      | 1,428                                                |
| 52.2%                        | 93.0%                | 11.8%                      | 11.2%         | 29.3                 | -3.6                    | 38.7%                  | 1.6%                                  | 1.0%                                      | 1,707                                                |
| 61.5%                        | 91.8%                | 11.8%                      | 11.3%         | 35.3                 | -3.6                    | 39.9%                  | 1.9%                                  | 1.2%                                      | 2,058                                                |
| 67.1%                        | 91.0%                | 11.9%                      | 11.3%         | 39.0                 | -3.7                    | 40.4%                  | 2.1%                                  | 1.3%                                      | 2,270                                                |
| 74.5%                        | 90.0%                | 11.9%                      | 11.4%         | 43.9                 | -3.7                    | 41.0%                  | 2.3%                                  | 1.5%                                      | 2,555                                                |
| 82.0%                        | 89.0%                | 11.9%                      | 11.4%         | 48.8                 | -3.7                    | 41.5%                  | 2.6%                                  | 1.6%                                      | 2,841                                                |
| <b>87.0%</b>                 | <b>88.3%</b>         | <b>12.0%</b>               | <b>11.4%</b>  | <b>52.1</b>          | <b>-3.7</b>             | <b>41.8%</b>           | <b>2.8%</b>                           | <b>1.8%</b>                               | <b>3,034</b>                                         |
| 96.0%                        | 87.1%                | 12.0%                      | 11.5%         | 58.1                 | -3.7                    | 42.3%                  | 3.1%                                  | 2.0%                                      | 3,384                                                |

**Supplementary Table S3.** Portfolio value and industry profits increase with reductions in the false negative rate (FNR) of the preclinical toxicology assessment, which cause fewer toxic drugs to enter the clinic. The leftmost column tabulates the proportional improvement in DILI detection versus the base case, and the next column shows the improvement in the toxicology FNR relative to the model's base case. Since DILI is around 13% or tox failure in development, near total DILI sensitivity can reduce the FNR to around 87% of its base case value. Subsequent columns then show the clinical development success rate from entry into Phase I to launch, the internal rate of return (IRR) of the R&D portfolio, the NPV of the portfolio discounted to the time of drug launch, the capitalized cost of Liver-Chips used in assessing the portfolio (discounted to the time of launch), and the marginal IRR on the Liver-Chip investment. The remaining columns capture the value uplift due to FNR improvement as a percentage uplift of the portfolio's NPV relative to the baseline NPV of R&D, percentage uplift of steady state pre-tax profits, and the estimated increase in annual pre-tax profits for the small-molecule drug development industry. The row highlighted in dark gray relates to the improvement in FNR that may result from incorporating the Liver-Chip into DILI prediction workflows in accordance with the 87% sensitivity estimated by the present study. The rows highlighted in light gray correspond to the 95% confidence interval around this point estimate. The economic model behind these calculations is provided in full in the Supplementary Materials.
